# Supplementary material for: Production of viable trout offspring derived from frozen whole fish
Source: PubMed Central journal article supplement (PMC4629203; doi:10.1038/srep16045), 2015-11-02
Supplement: srep16045-s1.pdf [file srep16045-s1.pdf]

## Supplementary Information

### **Production of viable trout offspring derived from frozen whole fish**

Seungki Lee<sup>1,2</sup>, Shinsuke Seki<sup>1</sup>, Naoto Katayama<sup>1</sup> & Goro Yoshizaki<sup>1†</sup>

<sup>1</sup>Department of Marine Biosciences, Tokyo University of Marine Science and Technology,  
Tokyo 108-8477, Japan

<sup>2</sup>Biological and Genetic Resources Assessment Division, National Institute of Biological  
Resources, Incheon 404-708, Korea

†Correspondence should be addressed to Goro Yoshizaki.

Goro Yoshizaki, Professor

Department of Marine Biosciences, Tokyo University of Marine Science and Technology  
4-5-7 Konan, Minato-ku, Tokyo 108-8477, Japan

Tel: +81-3-5463-0558

Fax: +81-3-5463-0558

Email: goro@kaiyodai.ac.jp

## Supplementary Figure Legends

### Supplementary Figure 1. Measurement of temperature changes inside whole trout during

**the cooling process.** (a) To measure temperature changes in the intraperitoneal cavity during whole fish cooling, thermocouples connected to a digital thermometer were inserted through the anus of orange colored *vasa-Gfp* rainbow trout. (b–e) The whole trout fish were cooled in a polystyrene foam box filled with  $-79^{\circ}\text{C}$  dry ice (DI) cubes (b), a  $-80^{\circ}\text{C}$  standard deep freezer (c), a polystyrene foam box filled with  $-80^{\circ}\text{C}$  ethanol prechilled in a standard deep freezer (d), and  $-196^{\circ}\text{C}$  liquid nitrogen (e). Freezing whole fish in DI or a  $-80^{\circ}\text{C}$  freezer can reproduce the slow freezing process. All images were taken by Seungki Lee.

### Supplementary Figure 2. Temperature of extracellular ice formation inside of whole trout

**during cooling process.** (a–d) To determine the temperatures of extracellular ice formation (EIF), trout blood samples (3  $\mu\text{l}$ ) were subjected to differential scanning calorimetry at scan rates of  $-1.0^{\circ}\text{C}/\text{min}$ ,  $-1.3^{\circ}\text{C}/\text{min}$ ,  $-19.8^{\circ}\text{C}/\text{min}$ , and  $-130.1^{\circ}\text{C}/\text{min}$ . EIF occurred at  $-13.8^{\circ}\text{C}$  (a),  $-17.2^{\circ}\text{C}$  (b),  $-22.5^{\circ}\text{C}$  (c), and  $-27.1^{\circ}\text{C}$  (d) during cooling in  $-79^{\circ}\text{C}$  dry ice, in a  $-80^{\circ}\text{C}$  freezer, in  $-80^{\circ}\text{C}$  ethanol, and in  $-196^{\circ}\text{C}$  liquid nitrogen, respectively.

### Supplementary Figure 3. Freezing conditions of whole trout following body weight. (a–d) To

examine the effects of frozen whole trout body weight on type A spermatogonia (ASG) survival, orange-colored *pvasa-Gfp* rainbow trout weighing  $0.9 \pm 0.1$  g at 3-month-old (a),  $18.8 \pm 1.6$  g at 10-month-old (b),  $101.6 \pm 5.7$  g at 15-month-old (c), and  $203.9 \pm 8.0$  g at 18-month-old (d) were frozen in a  $-80^{\circ}\text{C}$  standard deep freezer for 8, 372, and 735 days ( $n = 5$ ). (e) No viable ASG were retrieved from whole trout weighing 0.9 g frozen in a freezer for 735 days. (f–h) Testicular cells retrieved from whole trout weighing 18.8 g (f), 101.6 g (g), and 203.9 g (h) frozen in a freezer for

735 days. **(i)** Viability of ASG retrieved from whole trout weighing 18.8, 101.6, and 203.9 g frozen in a freezer for 8, 372, and 735 days. There were no significant differences in ASG viability among different freezing periods. ( $n = 4-5$ ). **(j)** GFP (+) ASG retrieved from 203.9 g frozen whole trout (arrow) were incorporated into the genital ridges of wild-type trout. **(k,l)** Incorporated ASG (arrows) began to proliferate within the recipient gonads **(k)** and the gonad of a nontransplanted control **(l)**. **(m-o)** Percentage of recipients that contained donor ASG within recipient gonads **(m)**, number of ASG incorporated into recipient gonads **(n)**, and percentage of recipients having proliferating donor ASG **(o)** were not significantly different between 203.9 g frozen trout and fresh control groups ( $n = 26-33$ ). Data are shown as mean  $\pm$  SEM. Scale bars, 5 cm **(a-d)**; 20  $\mu$ m **(e-h, j-l)**. All images were taken by Seungki Lee.

**Supplementary Figure 4. Transplantation of testicular cells retrieved from frozen whole trout into salmon recipients.** **(a)** Frozen-thawed trout GFP (+) ASG that were transplanted into salmon recipients migrated toward recipient genital ridges and were subsequently incorporated into them. **(b-d)** The transplanted donor ASG began to proliferate (arrow in **b** and **c**) and differentiate into oocytes in xenogeneic female recipients **(d)**. Scale bars, 20  $\mu$ m **(a-d)**.

**Supplementary Figure 5. Sperm produced by trout (1- and 2-year-old) and salmon (1-year-old) recipients and their developmental performance.** **(a,b)** Milt volume **(a)** and sperm number **(b)** produced by recipients with freshly prepared type A spermatogonia (ASG; Fresh and MS-Fresh), recipients that received ASG frozen for 7 (F 7), 30 (F 30), 189 (F 189, dry ice [DI] 189, and liquid nitrogen [LN<sub>2</sub>] 189), 371 (F 371 and MS-F 371), and 738 days (F 738), and wild-type fish (WT trout and WT salmon) at 1 year of age (\*\*,\*\*\* $P < 0.01$ ). **(c,d)** Milt volume **(c)** and sperm number **(d)** produced by fresh, F 7, F 30, F 189, F 371, F 738, DI 189, LN<sub>2</sub> 189, and WT

trout at 2 years of age (\*\* $P < 0.01$ ). **(e,f)** Fertilization rates **(e)** and hatching rates **(f)** of eggs inseminated with milt obtained from fresh, F 7, F 30, F 189, F 371, F 738, MS-F 371, MS-Fresh, WT trout, and WT salmon at 1 year of age. **(g,h)** Fertilization rates **(g)** and hatching rates **(h)** of eggs inseminated with milt obtained from fresh, F 7, F 30, F 189, F 371, F 738, and WT trout at 2 years of age. Milt obtained from trout recipients at 1 and 2 years of age were inseminated with eggs obtained from WT trout of the same ages. There were no significant differences within each developmental stage. Data are shown as mean  $\pm$  SEM ( $n$  = number of mature fish within each group).

**Supplementary Figure 6. Eggs produced by 2-year-old trout recipients and their**

**developmental performance.** **(a)** Number of eggs produced by recipients of spermatogonia derived from whole trout frozen for 0 (fresh), 7 (F 7), 30 (F 30), 189 (F 189 and liquid nitrogen [LN<sub>2</sub>] 189), 371 (F 371), and 738 days (F 738) and wild-type (WT) trout at 2 years of age. There were no significant differences in egg number among recipient groups, excluding WT trout (\*\* $P < 0.01$ ). **(b)** Diameter of eggs obtained from fresh, F 7, F 30, F 189, F 371, F 738, LN<sub>2</sub> 189, and WT trout at ages 2 years of age. **(c,d)** Fertilization rates **(c)** and hatching rates **(d)** of eggs derived from fresh, F 7, F 30, F 189, F 371, F 738, and WT trout at age 2 years of age. Eggs obtained from female recipients were inseminated with milt obtained from WT trout. **(e–h)** Approximately 50% of the embryos produced by mating between 2-year-old F 738 females and 2-year-old WT trout males displayed orange body color (dashed circles in **e**) and GFP-positive germ cells (arrowheads in **f**), suggesting that all F1 offspring were donor-derived. Embryos of WT trout as controls for **e** **(g)** and **f** **(h)**. Data are shown as mean  $\pm$  SEM ( $n$  = number of mature fish within each group). Scale bars, 5 mm **(e,g)**. All images were taken by Seungki Lee.

Supplementary Figure 1 Lee et. al.

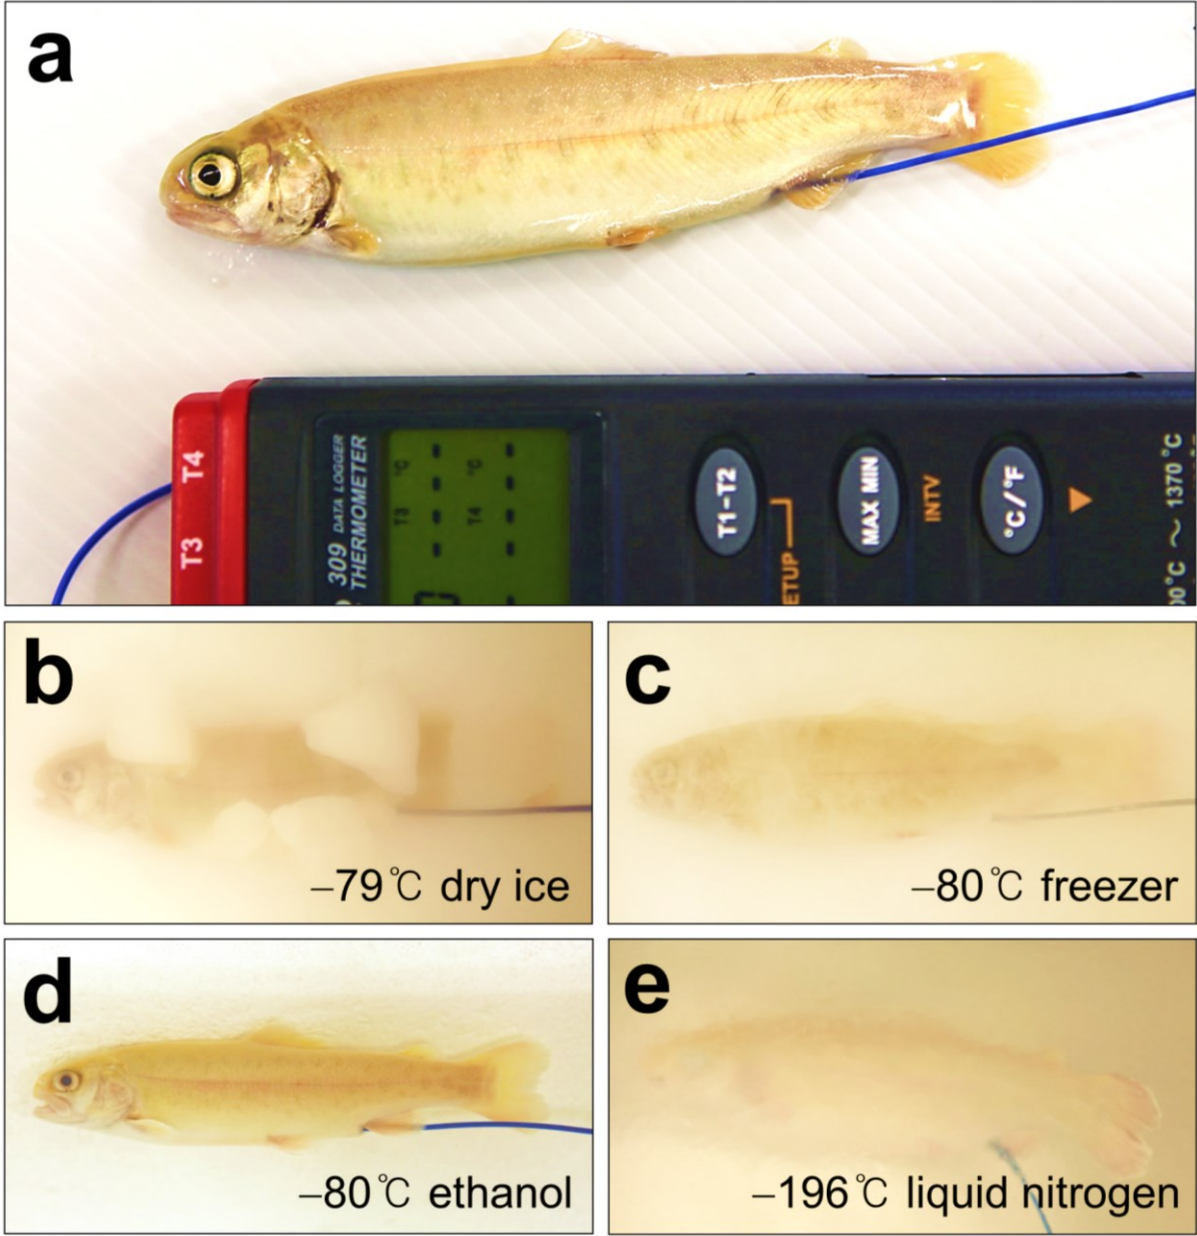

## Supplementary Figure 2 Lee et. al.

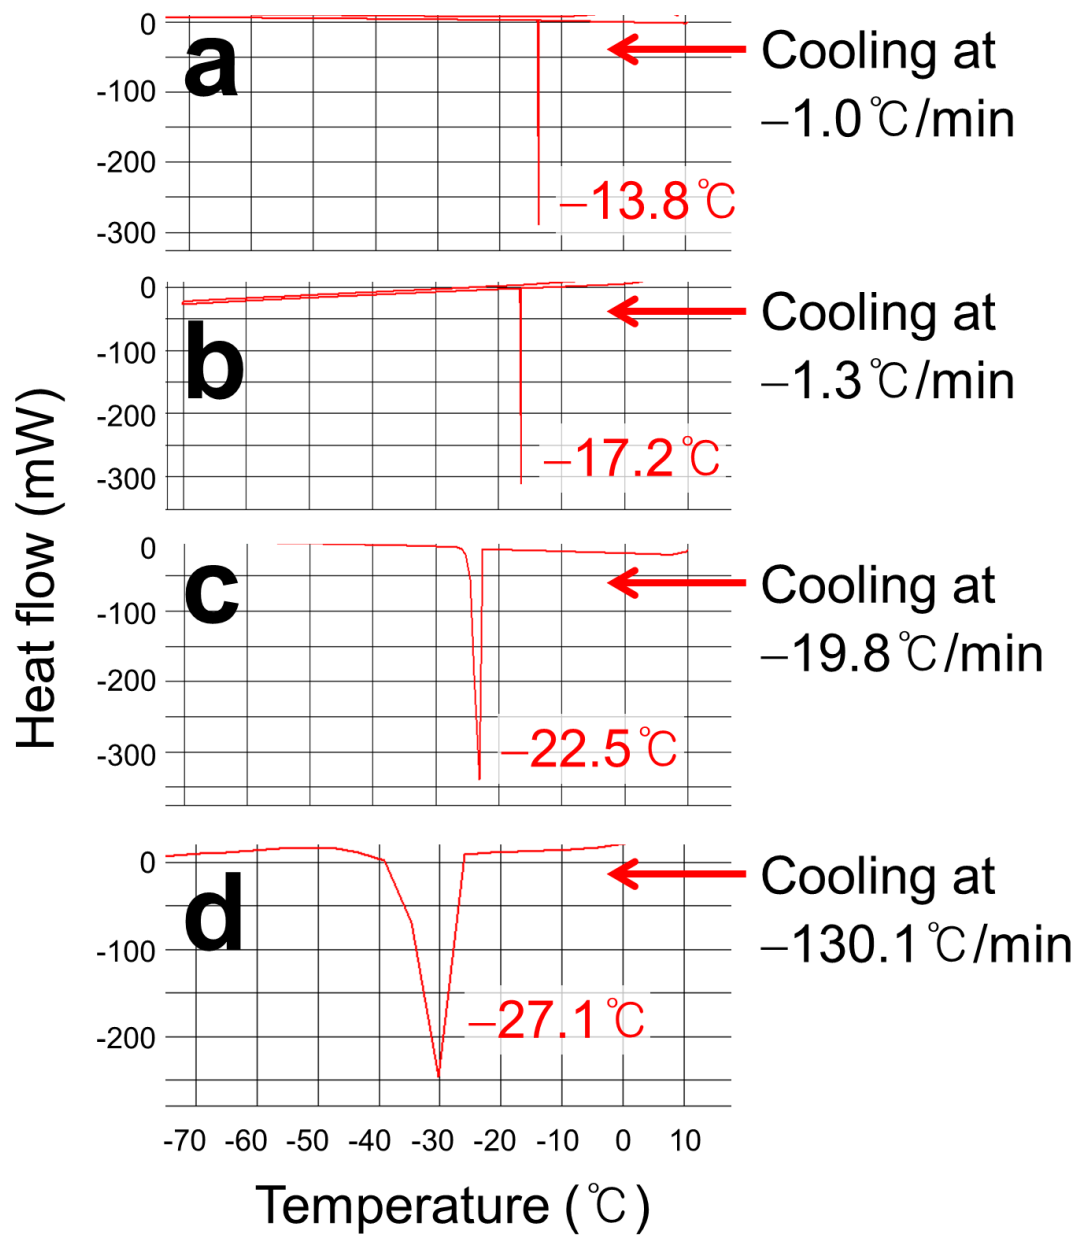

# Supplementary Figure 3 Lee et. al.

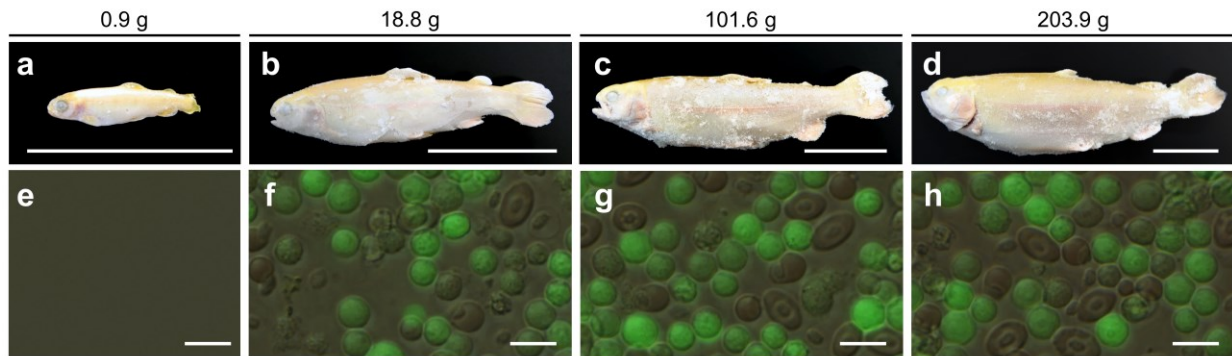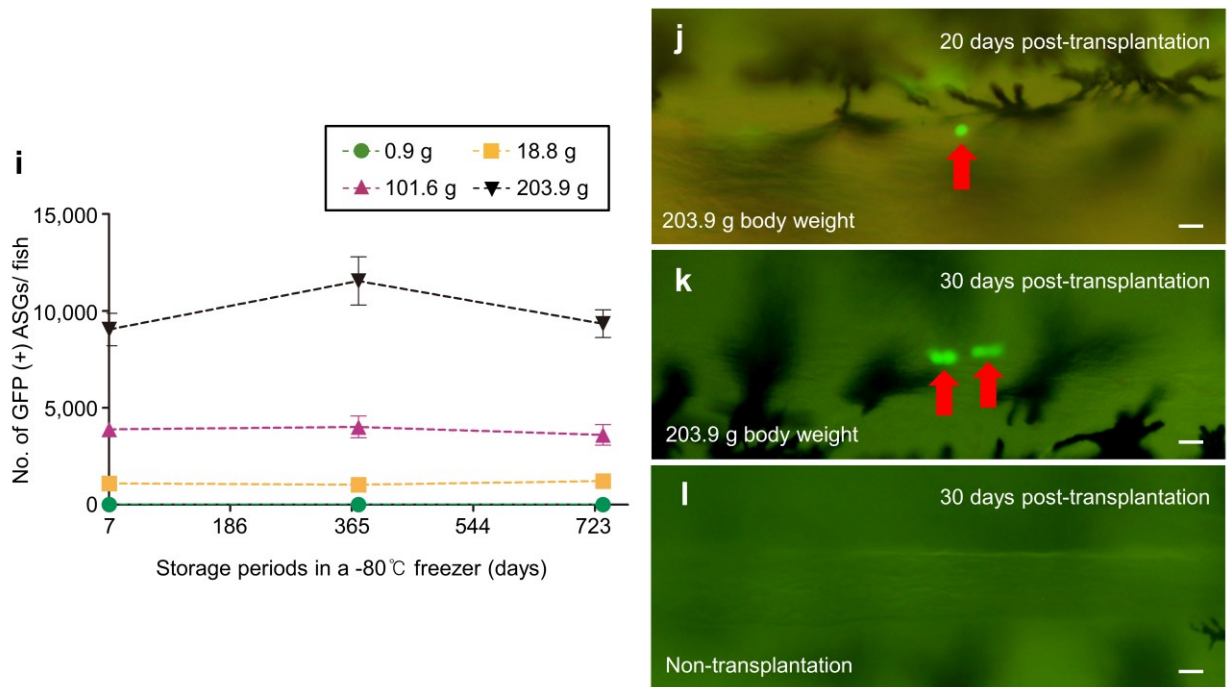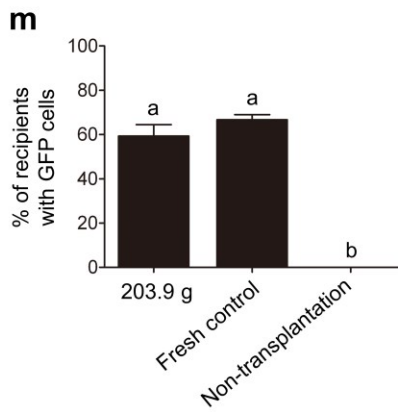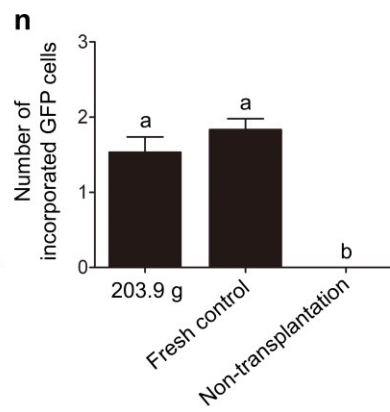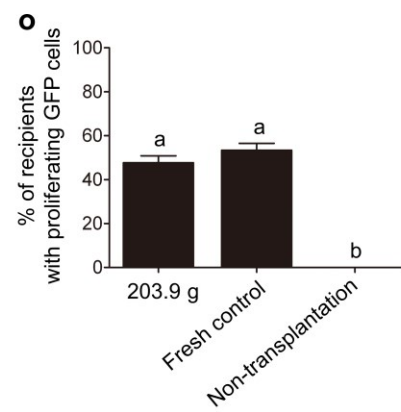

**Supplementary Figure 4 Lee et. al.**

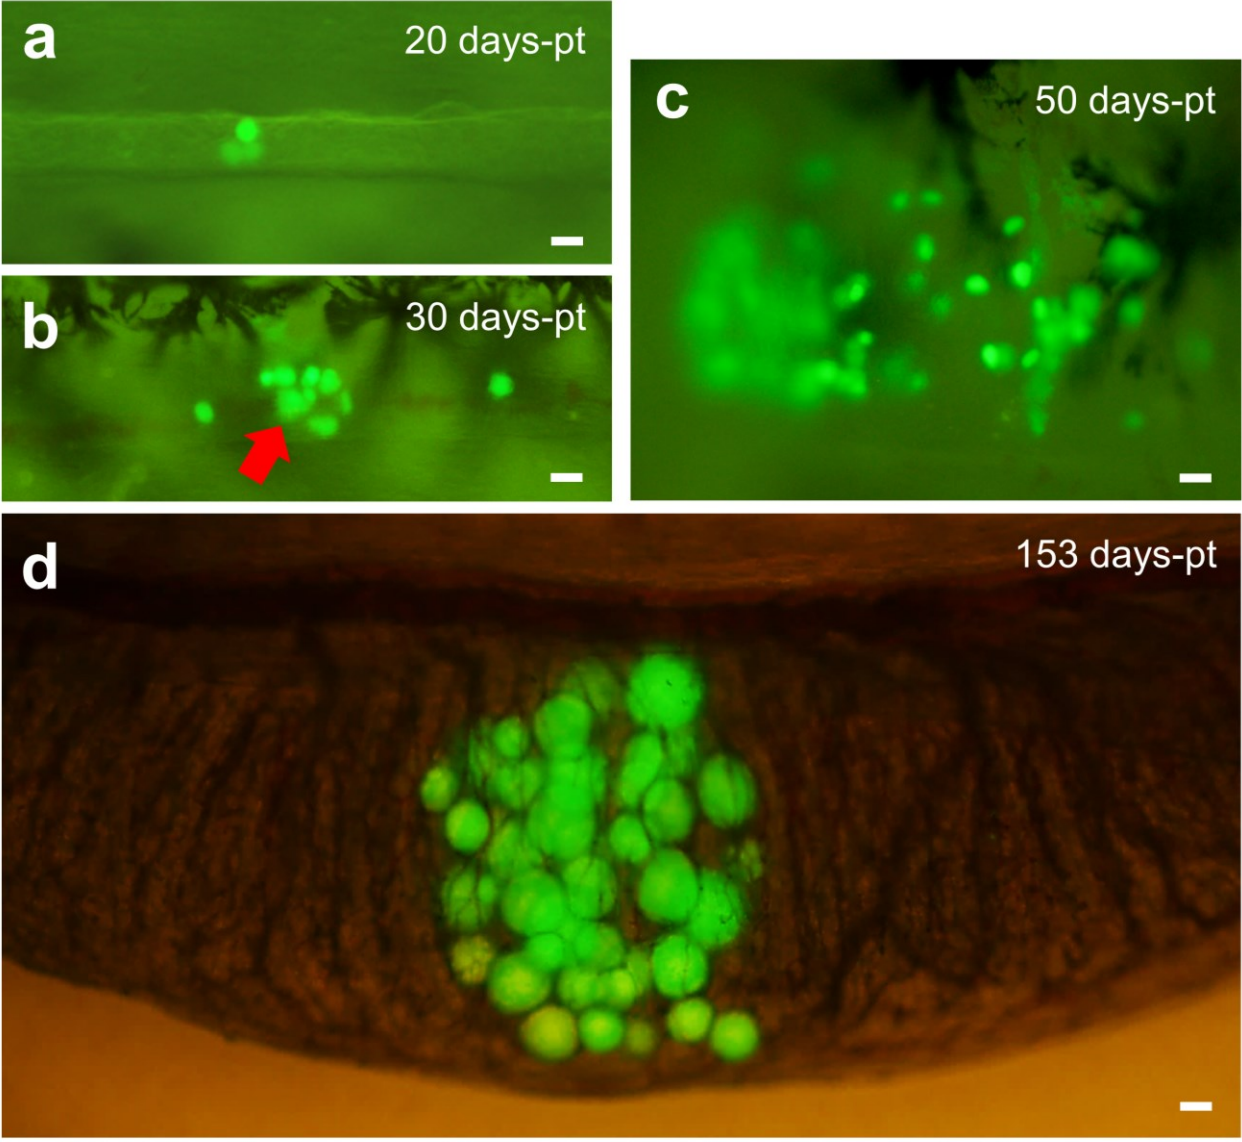



# Supplementary Figure 5 Lee et. al.

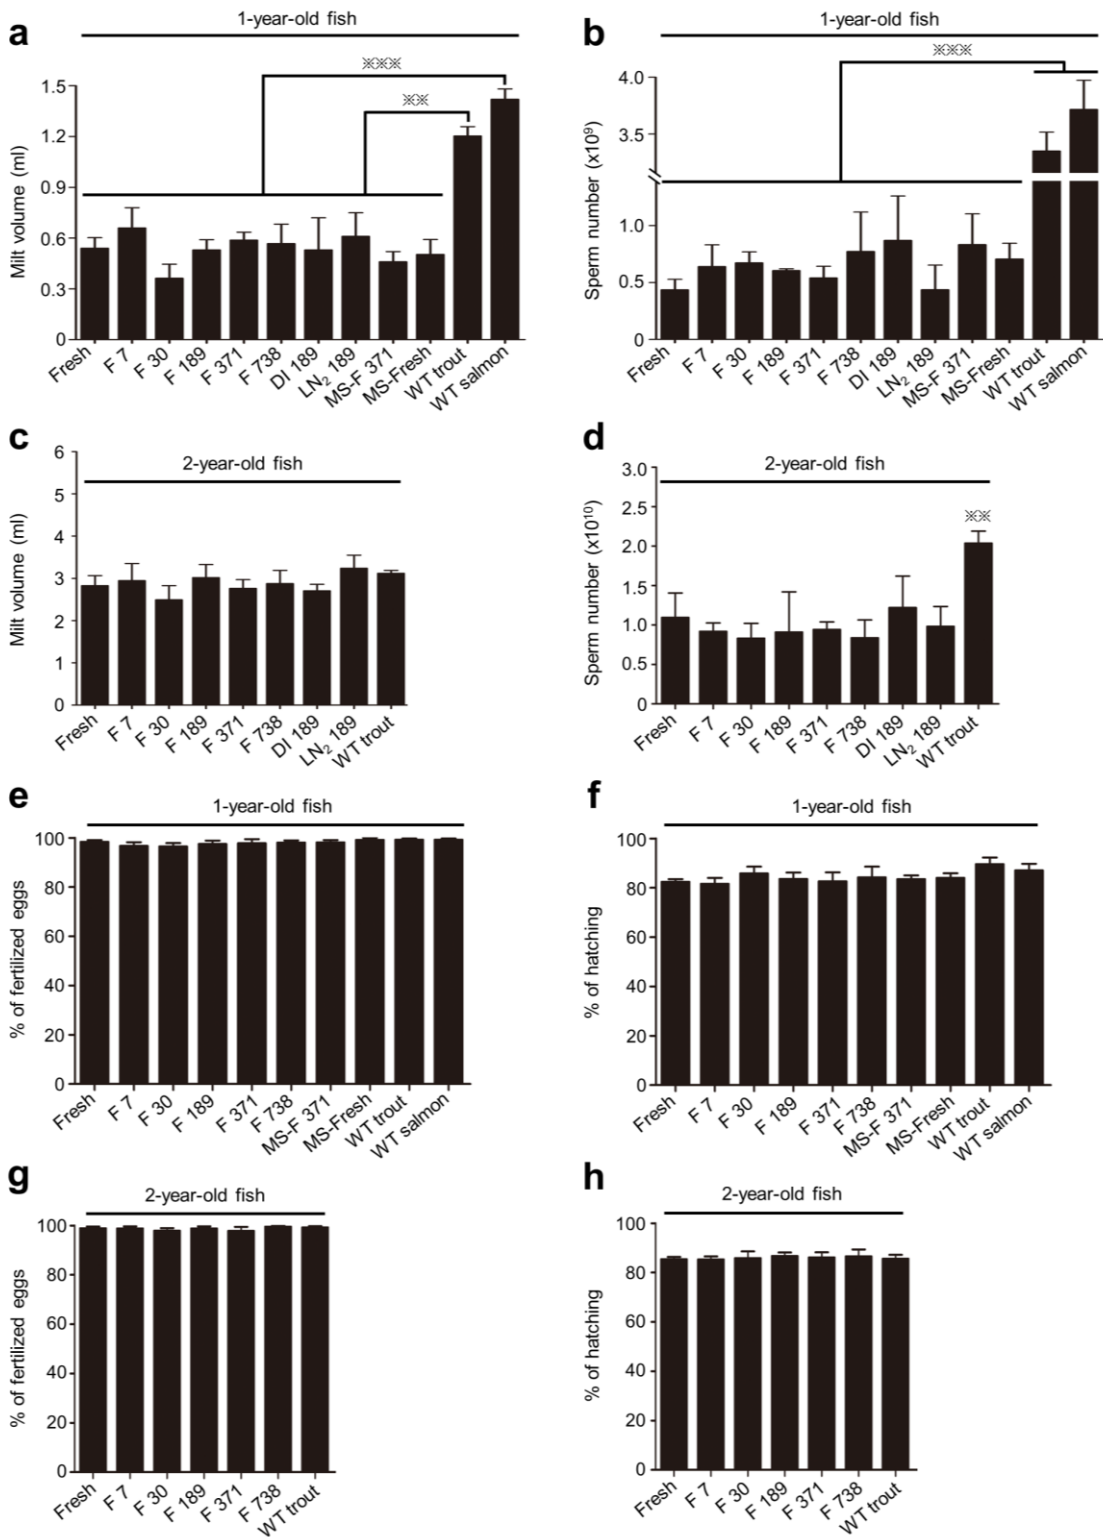

# Supplementary Figure 6 Lee et. al.

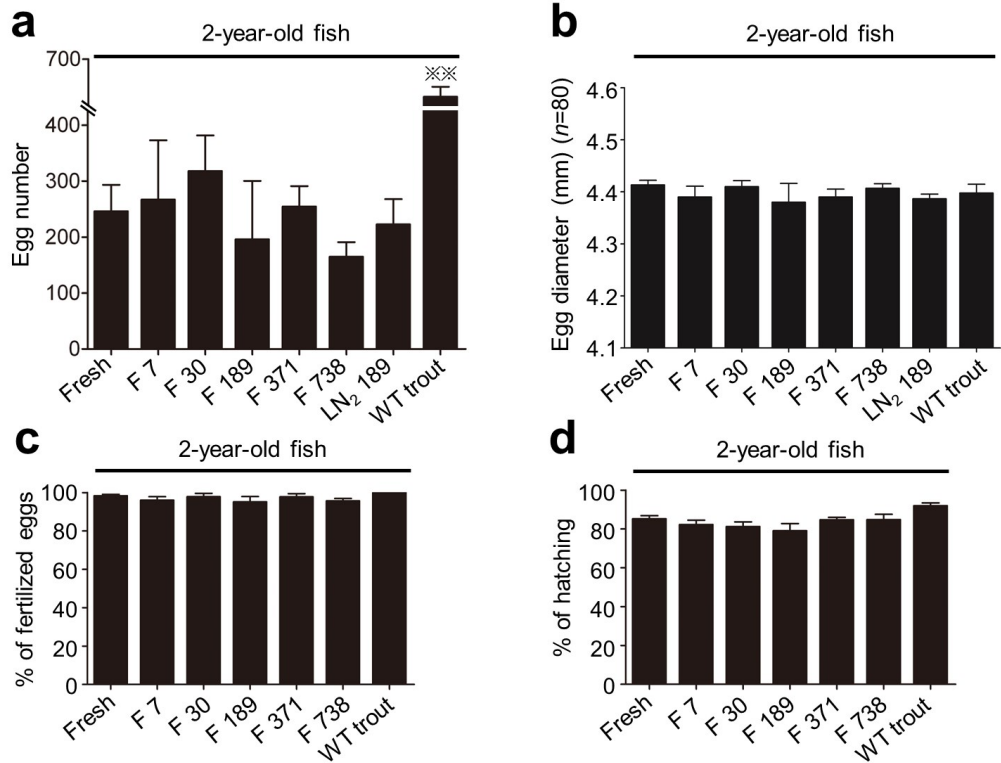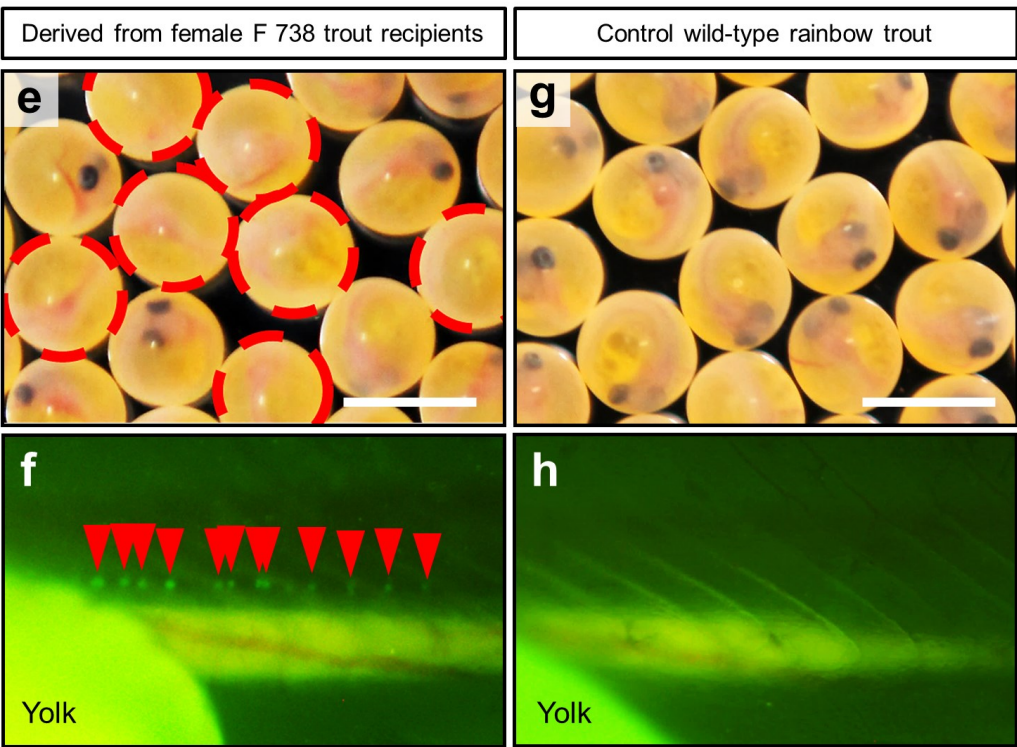

**Table S1. Appearance rate of donor-derived haplotypes among F1 generation of male recipients and sex ratio in F1 offspring**

| Group              | Male recipient    | Age (year) | No. of fish analyzed | Orange-colored (%) | GFP positive (%) | Male (%)   | Female (%) |            |
|--------------------|-------------------|------------|----------------------|--------------------|------------------|------------|------------|------------|
| Fresh <sup>a</sup> | #1                | 1          | 141                  | 74 (52.5)          | 69 (48.9)        | 62 (44.0)  | 79 (56.0)  |            |
|                    |                   | 2          | 192                  | 91 (47.4)          | 102 (53.1)       | 97 (50.5)  | 95 (49.5)  |            |
|                    | #2                | 1          | 74                   | 34 (45.9)          | 43 (58.1)        | 38 (51.4)  | 36 (48.6)  |            |
|                    |                   | 2          | 162                  | 75 (46.3)          | 80 (49.4)        | 77 (47.5)  | 85 (52.5)  |            |
|                    | #3                | 1          | 136                  | 60 (44.1)          | 75 (55.1)        | 58 (42.6)  | 78 (57.4)  |            |
|                    |                   | 2          | 208                  | 109 (52.4)         | 98 (47.1)        | 98 (47.1)  | 110 (52.9) |            |
|                    | #4                | 1          | 90                   | 32 (35.6)          | 51 (56.7)        | 45 (50.0)  | 45 (50.0)  |            |
|                    |                   | 2          | 210                  | 114 (54.3)         | 109 (51.9)       | 106 (50.5) | 104 (49.5) |            |
|                    | #5 <sup>f</sup>   | 1          | 93                   | 42 (45.2)          | 36 (38.7)        | 44 (47.3)  | 49 (52.7)  |            |
|                    | #6 <sup>g</sup>   | 2          | 218                  | 108 (49.5)         | 119 (54.6)       | 104 (47.7) | 114 (52.3) |            |
|                    | #7 <sup>g</sup>   | 2          | 220                  | 99 (45.0)          | 105 (47.7)       | 100 (45.5) | 120 (54.5) |            |
|                    | #8 <sup>g</sup>   | 2          | 207                  | 107 (51.7)         | 110 (53.1)       | 101 (48.8) | 106 (51.2) |            |
|                    | Mean              | 1          | 107                  | 48 (44.7)          | 55 (51.5)        | 49 (47.1)  | 57 (52.9)  |            |
|                    |                   | 2          | 202                  | 100 (49.5)         | 103 (51.0)       | 98 (48.2)  | 105 (51.8) |            |
| F 7 <sup>b</sup>   | #1                | 1          | 96                   | 46 (47.9)          | 47 (49.0)        | 53 (55.2)  | 43 (44.8)  |            |
|                    |                   | 2          | 219                  | 108 (49.3)         | 118 (53.9)       | 104 (47.5) | 115 (52.5) |            |
|                    | #2                | 1          | 99                   | 49 (49.5)          | 59 (59.6)        | 47 (47.5)  | 52 (52.5)  |            |
|                    |                   | 2          | 215                  | 94 (43.7)          | 103 (47.9)       | 109 (50.7) | 106 (49.3) |            |
|                    | #3                | 1          | 104                  | 43 (41.3)          | 46 (44.2)        | 55 (52.9)  | 49 (47.1)  |            |
|                    |                   | 2          | 193                  | 103 (53.4)         | 95 (49.2)        | 98 (50.8)  | 95 (49.2)  |            |
|                    | #4                | 1          | 87                   | 38 (43.7)          | 42 (48.3)        | 45 (51.7)  | 42 (48.3)  |            |
|                    |                   | 2          | 257                  | 126 (49.0)         | 117 (45.5)       | 115 (44.7) | 142 (55.3) |            |
|                    | #5 <sup>g</sup>   | 2          | 252                  | 122 (48.4)         | 124 (49.2)       | 119 (47.2) | 133 (52.8) |            |
|                    | Mean              | 1          | 97                   | 44 (45.6)          | 49 (50.3)        | 50 (51.8)  | 47 (48.2)  |            |
|                    |                   | 2          | 227                  | 111 (48.8)         | 111 (49.1)       | 109 (48.2) | 118 (51.8) |            |
|                    | F 30 <sup>b</sup> | #1         | 1                    | 116                | 70 (60.3)        | 57 (49.1)  | 62 (53.4)  | 54 (46.6)  |
|                    |                   |            | 2                    | 210                | 115 (54.8)       | 108 (51.4) | 101 (48.1) | 109 (51.9) |
|                    |                   | #2         | 1                    | 75                 | 34 (45.3)        | 47 (62.7)  | 40 (53.3)  | 35 (46.7)  |
| 2                  |                   |            | 215                  | 104 (48.4)         | 109 (50.7)       | 113 (52.6) | 102 (47.4) |            |
| #3                 |                   | 1          | 108                  | 58 (53.7)          | 50 (46.3)        | 55 (50.9)  | 53 (49.1)  |            |
|                    |                   | 2          | 227                  | 107 (47.1)         | 116 (51.1)       | 106 (46.7) | 121 (53.3) |            |
| #4                 |                   | 1          | 140                  | 67 (47.9)          | 60 (42.9)        | 72 (51.4)  | 68 (48.6)  |            |
|                    |                   | 2          | 253                  | 121 (47.8)         | 112 (44.3)       | 110 (43.5) | 143 (56.5) |            |
| #5 <sup>g</sup>    |                   | 2          | 229                  | 109 (47.6)         | 105 (45.9)       | 102 (44.5) | 127 (55.5) |            |
| #6 <sup>g</sup>    |                   | 2          | 200                  | 105 (52.5)         | 97 (48.5)        | 107 (53.5) | 93 (46.5)  |            |
| #7 <sup>g</sup>    |                   | 2          | 239                  | 112 (46.9)         | 103 (43.1)       | 117 (49.0) | 122 (51.0) |            |
| Mean               |                   | 1          | 110                  | 57 (51.8)          | 54 (50.3)        | 57 (52.2)  | 53 (47.8)  |            |
|                    |                   | 2          | 225                  | 110 (49.3)         | 107 (47.9)       | 108 (48.3) | 117 (51.7) |            |

**Table S1. Cont.**

| Group                 | Male recipient     | Age (year) | No. of fish analyzed | Orange-colored (%) | GFP positive (%) | Male (%)   | Female (%) |
|-----------------------|--------------------|------------|----------------------|--------------------|------------------|------------|------------|
| F 189 <sup>b</sup>    | #1                 | 1          | 110                  | 53 (48.2)          | 46 (41.8)        | 58 (52.7)  | 52 (47.3)  |
|                       |                    | 2          | 214                  | 100 (46.7)         | 112 (52.3)       | 101 (47.2) | 113 (52.8) |
|                       | #2                 | 1          | 133                  | 63 (47.4)          | 61 (45.9)        | 59 (44.4)  | 74 (55.6)  |
|                       |                    | 2          | 267                  | 132 (49.4)         | 147 (55.1)       | 143 (53.6) | 124 (46.4) |
|                       | #3 <sup>s</sup>    | 2          | 198                  | 84 (42.4)          | 91 (46.0)        | 96 (48.5)  | 102 (51.5) |
|                       | #4 <sup>s</sup>    | 2          | 221                  | 119 (53.8)         | 109 (49.3)       | 98 (44.3)  | 123 (55.7) |
|                       | Mean               | 1          | 122                  | 58 (47.8)          | 54 (43.9)        | 59 (48.5)  | 63 (51.5)  |
|                       |                    | 2          | 225                  | 109 (48.1)         | 115 (50.7)       | 110 (48.4) | 116 (51.6) |
| F 371 <sup>b</sup>    | #1                 | 1          | 163                  | 76 (46.6)          | 86 (52.8)        | 78 (47.9)  | 85 (52.1)  |
|                       |                    | 2          | 228                  | 102 (44.7)         | 119 (52.2)       | 110 (48.2) | 118 (51.8) |
|                       | #2                 | 1          | 216                  | 100 (46.3)         | 110 (50.9)       | 112 (51.9) | 104 (48.1) |
|                       |                    | 2          | 255                  | 135 (52.9)         | 121 (47.5)       | 136 (53.3) | 119 (46.7) |
|                       | #3                 | 1          | 74                   | 47 (63.5)          | 39 (52.7)        | 29 (39.2)  | 45 (60.8)  |
|                       |                    | 2          | 209                  | 104 (49.8)         | 113 (54.1)       | 102 (48.8) | 107 (51.2) |
|                       | #4                 | 1          | 165                  | 80 (48.5)          | 76 (46.1)        | 83 (50.3)  | 82 (49.7)  |
|                       |                    | 2          | 232                  | 115 (49.6)         | 127 (54.7)       | 131 (56.5) | 101 (43.5) |
|                       | #5 <sup>f</sup>    | 1          | 99                   | 43 (43.4)          | 49 (49.5)        | 53 (53.5)  | 46 (46.5)  |
|                       | #6 <sup>s</sup>    | 2          | 247                  | 119 (48.2)         | 108 (43.7)       | 109 (44.1) | 138 (55.9) |
|                       | #7 <sup>s</sup>    | 2          | 200                  | 98 (49.0)          | 101 (50.5)       | 106 (53.0) | 94 (47.0)  |
|                       | Mean               | 1          | 143                  | 69 (49.7)          | 72 (50.4)        | 71 (48.6)  | 72 (51.4)  |
|                       |                    | 2          | 229                  | 112 (49.0)         | 115 (50.5)       | 116 (50.7) | 113 (49.3) |
|                       | F 738 <sup>b</sup> | #1         | 1                    | 82                 | 39 (47.6)        | 43 (52.4)  | 49 (59.8)  |
| 2                     |                    |            | 200                  | 91 (45.5)          | 93 (46.5)        | 110 (55.0) | 90 (45.0)  |
| #2                    |                    | 1          | 102                  | 43 (42.2)          | 47 (46.1)        | 57 (55.9)  | 45 (44.1)  |
|                       |                    | 2          | 200                  | 90 (45.0)          | 99 (49.5)        | 89 (44.5)  | 111 (55.5) |
| #3                    |                    | 1          | 127                  | 65 (51.2)          | 62 (48.8)        | 61 (48.0)  | 66 (52.0)  |
|                       |                    | 2          | 243                  | 110 (45.3)         | 135 (55.6)       | 139 (57.2) | 104 (42.8) |
| #4 <sup>f</sup>       |                    | 1          | 105                  | 52 (49.5)          | 62 (59.0)        | 54 (51.4)  | 51 (48.6)  |
| #6 <sup>s</sup>       |                    | 2          | 198                  | 91 (46.0)          | 98 (49.5)        | 95 (48.0)  | 103 (52.0) |
| #7 <sup>s</sup>       |                    | 2          | 210                  | 107 (51.0)         | 96 (45.7)        | 108 (51.4) | 102 (48.6) |
| Mean                  |                    | 1          | 104                  | 50 (47.6)          | 54 (51.6)        | 55 (53.8)  | 49 (46.2)  |
|                       | 2                  | 210        | 98 (46.6)            | 104 (49.4)         | 108 (51.2)       | 102 (48.8) |            |
| MS-F 371 <sup>c</sup> | #1                 | 1          | 83                   | 45 (54.2)          | 41 (49.4)        | 47 (56.6)  | 36 (43.4)  |
|                       |                    | 2          | 237                  | 108 (45.6)         | 105 (44.3)       | 124 (52.3) | 113 (47.7) |
|                       | #2 <sup>f</sup>    | 1          | 69                   | 27 (39.1)          | 39 (56.5)        | 44 (63.8)  | 25 (36.2)  |
|                       | #3 <sup>f</sup>    | 1          | 75                   | 33 (44.0)          | 34 (45.3)        | 30 (40.0)  | 45 (60.0)  |
|                       | #4 <sup>s</sup>    | 2          | 200                  | 102 (51.0)         | 95 (47.5)        | 94 (47.0)  | 106 (53.0) |
|                       | #5 <sup>s</sup>    | 2          | 285                  | 134 (47.0)         | 138 (48.4)       | 156 (54.7) | 129 (45.3) |
|                       | #6 <sup>s</sup>    | 2          | 252                  | 127 (50.4)         | 136 (54.0)       | 138 (54.8) | 114 (45.2) |
|                       | Mean               | 1          | 76                   | 35 (45.8)          | 38 (50.4)        | 40 (53.5)  | 35 (46.5)  |
| 2                     |                    | 244        | 118 (48.5)           | 119 (48.5)         | 128 (52.2)       | 116 (47.8) |            |

**Table S1. Cont.**

| Group                  | Male recipient        | Age (year) | No. of fish analyzed | Orange-colored (%) | GFP positive (%) | Male (%)   | Female (%) |
|------------------------|-----------------------|------------|----------------------|--------------------|------------------|------------|------------|
| MS-Fresh <sup>d</sup>  | #1                    | 1          | 97                   | 41 (42.3)          | 49 (50.5)        | 40 (41.2)  | 57 (58.8)  |
|                        |                       | 2          | 260                  | 122 (46.9)         | 120 (46.2)       | 117 (45.0) | 143 (55.0) |
|                        | #2                    | 1          | 158                  | 78 (49.4)          | 83 (52.5)        | 80 (50.6)  | 78 (49.4)  |
|                        |                       | 2          | 251                  | 118 (47.0)         | 127 (50.6)       | 121 (48.2) | 130 (51.8) |
|                        | #3 <sup>f</sup>       | 1          | 100                  | 45 (45.0)          | 52 (52.0)        | 55 (55.0)  | 45 (45.0)  |
|                        | #4 <sup>g</sup>       | 2          | 200                  | 104 (52.0)         | 92 (46.0)        | 96 (48.0)  | 104 (52.0) |
|                        | #5 <sup>g</sup>       | 2          | 200                  | 95 (47.5)          | 97 (48.5)        | 106 (53.0) | 94 (47.0)  |
|                        | Mean                  | 1          | 118                  | 55 (45.5)          | 61 (51.7)        | 58 (49.0)  | 60 (51.0)  |
|                        |                       | 2          | 228                  | 110 (47.8)         | 109 (48.6)       | 110 (48.6) | 118 (51.4) |
|                        | WT trout <sup>e</sup> | Mean       | 1                    | 193                | 0 (0.0)          | 0 (0.0)    | 91 (47.2)  |
| Mean                   |                       | 2          | 186                  | 0 (0.0)            | 0 (0.0)          | 101 (54.3) | 85 (45.7)  |
| WT salmon <sup>e</sup> | Mean                  | 1          | 183                  | 0 (0.0)            | 0 (0.0)          | 96 (52.5)  | 87 (47.5)  |
|                        | Mean                  | 2          | 201                  | 0 (0.0)            | 0 (0.0)          | 94 (46.8)  | 107 (53.2) |

<sup>a</sup> Rainbow trout recipients received freshly prepared testicular cells.

<sup>b</sup> Rainbow trout recipients received testicular cells retrieved from whole rainbow trout frozen and stored in a freezer for 7, 30, 189, 371, or 738 days.

<sup>c</sup> Masu salmon recipients received testicular cells taken from whole rainbow trout frozen and stored in a freezer for 371 days.

<sup>d</sup> Masu salmon recipients received freshly prepared testicular cells.

<sup>e</sup> Wild-type diploid fish that did not undergo transplantation.

<sup>f</sup> Fish dead subsequent to spawning at age of 1 year.

<sup>g</sup> Fish initially matured at age of 2 years.

**Table S2. Appearance rate of donor-derived haplotypes among F1 generation of female recipients and sex ratio in F1 offspring**

| Group              | Female recipient | Age (years) | No. of fish analyzed | Orange-colored (%) | GFP positive (%) | Male (%)   | Female (%) |           |
|--------------------|------------------|-------------|----------------------|--------------------|------------------|------------|------------|-----------|
| Fresh <sup>a</sup> | #1               | 2           | 240                  | 127 (52.9)         | 116 (48.3)       | 181 (75.4) | 59 (24.6)  |           |
|                    |                  | 3           | 352                  | 251 (71.3)         | 270 (76.7)       | 263 (74.7) | 89 (25.3)  |           |
|                    | #2               | 2           | 200                  | 96 (48.0)          | 106 (53.0)       | 152 (76.0) | 48 (24.0)  |           |
|                    |                  | 3           | 200                  | 140 (70.0)         | 154 (77.0)       | 143 (71.5) | 57 (28.5)  |           |
|                    | #3               | 2           | 150                  | 62 (41.3)          | 60 (40.0)        | 120 (80.0) | 30 (20.0)  |           |
|                    |                  | 3           | 388                  | 289 (74.5)         | 272 (70.1)       | 285 (73.5) | 103 (26.5) |           |
|                    | #4               | 2           | 200                  | 94 (47.0)          | 98 (49.0)        | 138 (69.0) | 62 (31.0)  |           |
|                    |                  | 3           | 300                  | 223 (74.3)         | 238 (79.3)       | 212 (70.7) | 88 (29.3)  |           |
|                    | #5 <sup>f</sup>  | 2           | 200                  | 92 (46.0)          | 95 (47.5)        | 130 (65.0) | 70 (35.0)  |           |
|                    | Mean             | 2           | 198                  | 94 (47.1)          | 95 (47.6)        | 144 (73.1) | 54 (26.9)  |           |
| 3                  |                  | 310         | 226 (72.5)           | 234 (75.8)         | 226 (72.6)       | 84 (27.4)  |            |           |
| F 7 <sup>b</sup>   | #1               | 2           | 187                  | 90 (48.1)          | 99 (52.9)        | 147 (78.6) | 40 (21.4)  |           |
|                    | #2               | 2           | 150                  | 71 (47.3)          | 78 (52.0)        | 124 (82.7) | 26 (17.3)  |           |
|                    | Mean             | 2           | 169                  | 81 (47.7)          | 89 (52.5)        | 136 (80.6) | 33 (19.4)  |           |
| F 30 <sup>b</sup>  | #1               | 2           | 200                  | 94 (47.0)          | 102 (51.0)       | 142 (71.0) | 58 (29.0)  |           |
|                    |                  | 3           | 425                  | 317 (74.6)         | 331 (77.9)       | 340 (80.0) | 85 (20.0)  |           |
|                    | #2               | 2           | 200                  | 104 (52.0)         | 95 (47.5)        | 157 (78.5) | 43 (21.5)  |           |
|                    |                  | 3           | 400                  | 307 (76.8)         | 289 (72.3)       | 295 (73.8) | 105 (26.3) |           |
|                    | #3               | 2           | 215                  | 95 (44.2)          | 116 (54.0)       | 168 (78.1) | 47 (21.9)  |           |
|                    |                  | 3           | 338                  | 245 (72.5)         | 250 (74.0)       | 239 (70.7) | 99 (29.3)  |           |
|                    | #4 <sup>f</sup>  | 2           | 281                  | 138 (49.1)         | 155 (55.2)       | 201 (71.5) | 80 (28.5)  |           |
|                    | #5 <sup>g</sup>  | 3           | 400                  | 299 (74.8)         | 312 (78.0)       | 281 (70.3) | 119 (29.8) |           |
|                    | #6 <sup>g</sup>  | 3           | 559                  | 410 (73.3)         | 433 (77.5)       | 414 (74.1) | 145 (25.9) |           |
|                    |                  | Mean        | 2                    | 224                | 108 (48.1)       | 117 (51.9) | 167 (74.8) | 57 (25.2) |
| F 189 <sup>b</sup> | #1               | 3           | 424                  | 316 (74.4)         | 323 (75.9)       | 314 (73.7) | 111 (26.3) |           |
|                    |                  | 2           | 116                  | 54 (46.6)          | 68 (58.6)        | 98 (84.5)  | 18 (15.5)  |           |
|                    | #2               | 3           | 397                  | 308 (77.6)         | 280 (70.5)       | 287 (72.3) | 110 (27.7) |           |
|                    |                  | 2           | 200                  | 102 (51.0)         | 95 (47.5)        | 145 (72.5) | 55 (27.5)  |           |
|                    | #3               | 3           | 400                  | 288 (72.0)         | 316 (79.0)       | 311 (77.8) | 89 (22.3)  |           |
|                    |                  | 2           | 150                  | 91 (60.7)          | 73 (48.7)        | 123 (82.0) | 27 (18.0)  |           |
|                    | Mean             | 3           | 400                  | 318 (79.5)         | 307 (76.8)       | 316 (79.0) | 84 (21.0)  |           |
|                    |                  | 2           | 155                  | 82 (52.7)          | 79 (51.6)        | 122 (79.7) | 33 (20.3)  |           |
|                    |                  |             | 3                    | 399                | 305 (76.4)       | 301 (75.4) | 305 (76.3) | 94 (23.7) |

**Table S2. Cont.**

| Group                  | Female recipient | Age (years) | No. of fish analyzed | Orange-colored (%) | GFP positive (%) | Male (%)   | Female (%) |
|------------------------|------------------|-------------|----------------------|--------------------|------------------|------------|------------|
| F 371 <sup>b</sup>     | #1               | 2           | 159                  | 72 (45.3)          | 89 (56.0)        | 112 (70.4) | 47 (29.6)  |
|                        | #2               | 2           | 171                  | 89 (52.0)          | 85 (49.7)        | 122 (71.3) | 49 (28.7)  |
|                        | Mean             | 2           | 165                  | 81 (48.7)          | 87 (52.8)        | 117 (70.9) | 48 (29.1)  |
| F 738 <sup>b</sup>     | #1               | 2           | 200                  | 92 (46.0)          | 106 (53.0)       | 147 (73.5) | 53 (26.5)  |
|                        |                  | 3           | 400                  | 292 (73.0)         | 318 (79.5)       | 322 (80.5) | 78 (19.5)  |
|                        | #2               | 2           | 200                  | 94 (47.0)          | 108 (54.0)       | 155 (77.5) | 45 (22.5)  |
|                        |                  | 3           | 400                  | 285 (71.3)         | 290 (72.5)       | 281 (70.2) | 119 (29.8) |
|                        | #3               | 2           | 151                  | 83 (55.0)          | 80 (53.0)        | 108 (71.5) | 43 (28.5)  |
|                        |                  | 3           | 576                  | 453 (78.6)         | 414 (71.9)       | 427 (74.1) | 149 (25.9) |
|                        | #4               | 2           | 60                   | 26 (43.3)          | 23 (38.3)        | 40 (66.7)  | 20 (33.3)  |
|                        |                  | 3           | 400                  | 305 (76.3)         | 325 (81.3)       | 315 (78.8) | 85 (21.2)  |
|                        | #5               | 2           | 41                   | 16 (39.0)          | 19 (46.3)        | 23 (56.1)  | 18 (43.9)  |
|                        |                  | 3           | 435                  | 347 (79.8)         | 320 (73.6)       | 339 (77.9) | 96 (22.1)  |
|                        | #6 <sup>g</sup>  | 3           | 400                  | 286 (71.5)         | 311 (77.8)       | 323 (80.2) | 77 (19.3)  |
| Mean                   | 2                | 130         | 62 (46.1)            | 67 (48.9)          | 95 (69.2)        | 36 (30.8)  |            |
|                        | 3                | 435         | 328 (75.1)           | 330 (76.1)         | 335 (77.0)       | 101 (23.0) |            |
| MS-F 371 <sup>c</sup>  | #1               | 2           | 181                  | 141 (77.9)         | 130 (71.8)       | 135 (74.6) | 46 (25.4)  |
|                        | #2               | 2           | 82                   | 62 (75.6)          | 60 (73.2)        | 67 (81.7)  | 15 (18.3)  |
|                        | Mean             | 2           | 132                  | 102 (76.8)         | 95 (72.5)        | 101 (78.1) | 31 (21.9)  |
| MS-Fresh <sup>d</sup>  | #1               | 2           | 55                   | 37 (67.3)          | 41 (74.5)        | 33 (60.0)  | 22 (40.0)  |
|                        | #2               | 2           | 148                  | 118 (79.7)         | 104 (70.3)       | 116 (78.4) | 32 (21.6)  |
|                        | #3               | 2           | 183                  | 147 (80.3)         | 138 (75.4)       | 141 (77.0) | 42 (23.0)  |
|                        | #4               | 2           | 56                   | 29 (51.8)          | 45 (80.4)        | 42 (75.0)  | 14 (25.0)  |
|                        | Mean             | 2           | 111                  | 83 (69.8)          | 82 (75.1)        | 83 (72.6)  | 28 (27.4)  |
| WT trout <sup>e</sup>  | Mean             | 2           | 241                  | 0 (0.0)            | 0 (0.0)          | 116 (48.1) | 125 (51.9) |
|                        | Mean             | 3           | 258                  | 0 (0.0)            | 0 (0.0)          | 142 (55.0) | 116 (45.0) |
| WT salmon <sup>e</sup> | Mean             | 2           | 157                  | 0 (0.0)            | 0 (0.0)          | 85 (54.1)  | 72 (45.9)  |

<sup>a</sup> Rainbow trout recipients received freshly prepared testicular cells.

<sup>b</sup> Rainbow trout recipients received testicular cells retrieved from whole rainbow trout frozen and stored in a freezer for 7, 30, 189, 371, or 738 days.

<sup>c</sup> Masu salmon recipients received testicular cells taken from whole rainbow trout frozen and stored in a freezer for 371 days.

<sup>d</sup> Masu salmon recipients received freshly prepared testicular cells.

<sup>e</sup> Wild-type diploid fish that did not undergo transplantation.

<sup>f</sup> Fish dead subsequent to spawning at age of 2 years.

<sup>g</sup> Fish initially matured at age of 3 years.

**Table S3. Viability of GFP-labeled type A spermatogonia on cryoinjury**

| Group                      | No. of initial GFP-labeled type A spermatogonia <sup>c</sup> | Freezing condition (°C) | Storage condition (°C) | Storage period (hours) | Thawing condition (°C) <sup>d</sup> | No. of GFP-labeled type A spermatogonia (viability, %) <sup>e</sup> |
|----------------------------|--------------------------------------------------------------|-------------------------|------------------------|------------------------|-------------------------------------|---------------------------------------------------------------------|
| Frozen <sup>a</sup>        | 15,033 ± 458                                                 | Liquid nitrogen (-196)  | Liquid nitrogen (-196) | 3.5                    | Incubator (10)                      | 0 (0) <sup>f</sup>                                                  |
| Fresh control <sup>b</sup> | 15,467 ± 395                                                 | –                       | Incubator (10)         | 3.5                    | –                                   | 15,306 ± 526 (98.8 ± 1.1) <sup>g</sup>                              |

<sup>a</sup> Type A spermatogonia with 100 ml Eagle's minimum medium (EMEM) in cryotube frozen by direct plunging into liquid nitrogen followed by slow thawing.

<sup>b</sup> Type A spermatogonia with 100 ml EMEM in cryotube as a control of frozen group.

<sup>c</sup> Initial GFP-labeled type A spermatogonia prepared from pvasa-*Gfp* rainbow trout was maintained with EMEM in a 10°C incubator.

<sup>d</sup> Frozen cryotube were slowly thawed in pre-frozen Bicell slow-freezing container (Nihon Freezer) located in a 10°C incubator for 3 hours.

<sup>e</sup> Viability of GFP-labeled type A spermatogonia was analyzed by Guava PCA-96 flow cytometry (Millipore) immediately after thawing.

<sup>f,g</sup> Values in a column with different superscripts are significantly different ( $P < 0.05$ ).

Data are shown as mean ± standard error of the mean values derived from three independent experiments.

Statistical significance was determined using Student's *t*-test for comparisons between two groups.
